# Supplementary material for: Thermoresponsive hydrogels physically crosslinked with magnetically modified LAPONITE® nanoparticles
Source: Royal Society of Chemistry journal article supplement (doi:10.1039/d0sm00929f), 2020-01-01
Supplement: d0sm00929f1.pdf [file d0sm00929f1.pdf]

Electronic Supplementary Information

O. Goncharuk, Yu. Samchenko, L. Kernosenko, et al. **Thermoresponsive hydrogels physically crosslinked with magnetically modified LAPONITE® nanoparticles.**

*Soft Matter* 2020; <https://doi.org/10.1039/D0SM00929F>

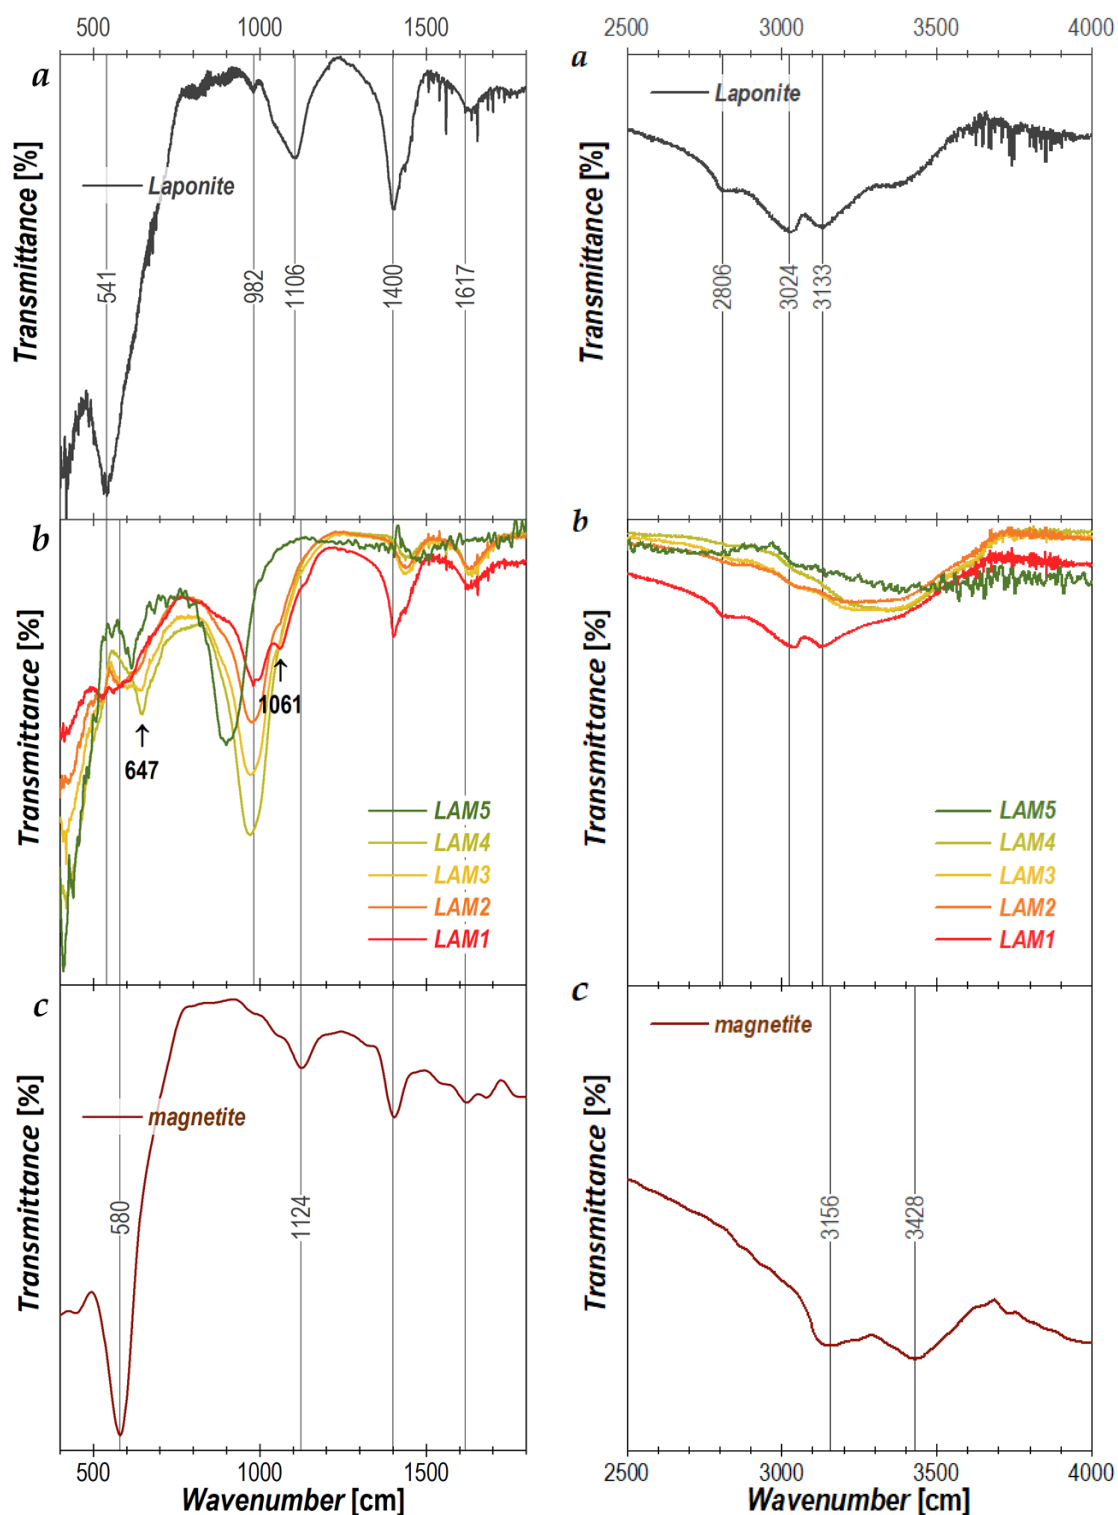

**Fig. S1.** IR spectra (transmittance) of Laponite (a), LAM1-LAM5 (b), and magnetite (c) in 400-1750 cm<sup>-1</sup> (left) and 2500-4000 cm<sup>-1</sup> (right) wavenumber region.

## Electronic Supplementary Information

O. Goncharuk, Yu. Samchenko, L. Kernosenko, et al. **Thermoresponsive hydrogels physically crosslinked with magnetically modified LAPONITE® nanoparticles.**

*Soft Matter* 2020; <https://doi.org/10.1039/D0SM00929F>

**Table SI.** Fitting parameters for temperature-depending swelling degree of polyNIPAAm hydrogel nanocomposites with incorporated Laponite and LAM nanoparticles.

| Sample              | Inflection point $C_0$ | Bottom asymptote, $A_1$ [g/g] | Top asymptote, $A_2$ [g/g] | Slope $p$ [g/(g×T)] | $R^2_{adj}$ . |
|---------------------|------------------------|-------------------------------|----------------------------|---------------------|---------------|
| polyNIPAAm/Laponite | 28.8 ± 0.7             | 0.2 ± 0.4                     | 10.9 ± 0.5                 | -0.14 ± 0.04        | 0.98483       |
| polyNIPAAm/LAM5     | 30.7 ± 0.7             | 0.2 ± 0.9                     | 14.3 ± 1.2                 | -0.22 ± 0.07        | 0.95390       |
| polyNIPAAm/LAM4     | 29.3 ± 1.2             | 0.2 ± 2.0                     | 24.9 ± 2.4                 | -0.15 ± 0.08        | 0.93441       |
| polyNIPAAm/LAM3     | 29.3 ± 0.7             | 0.1 ± 1.1                     | 22.1 ± 1.5                 | -0.19 ± 0.06        | 0.97047       |
| polyNIPAAm/LAM2     | 29.5 ± 0.9             | -0.2 ± 1.8                    | 27.5 ± 2.3                 | -0.18 ± 0.07        | 0.95533       |
| polyNIPAAm/LAM1     | 30.4 ± 0.6             | 0 ± 1.3                       | 26.2 ± 1.8                 | -0.24 ± 0.06        | 0.97090       |

**Table SII.** Results of integration of the first derivative of fitted temperature-depending swelling degree of polyNIPAAm hydrogel nanocomposites with incorporated Laponite and LAM nanoparticles. The values are color-coded: minimal values are highlighted green, maximal – yellow; FWHM stands for full width at half maximum.

| Sample              | Integration results for $Q'-T$ curves |                   |      |      |
|---------------------|---------------------------------------|-------------------|------|------|
|                     | $Q'_{max}$                            | $T$ at $Q'_{max}$ | Area | FWHM |
| polyNIPAAm/Laponite | -0.87                                 | 28.8              | 10.6 | 10.7 |
| polyNIPAAm/LAM5     | -1.80                                 | 30.7              | 14.1 | 6.9  |
| polyNIPAAm/LAM4     | -2.20                                 | 29.3              | 24.7 | 9.9  |
| polyNIPAAm/LAM3     | -2.40                                 | 29.3              | 22.0 | 8.1  |
| polyNIPAAm/LAM2     | -2.83                                 | 29.6              | 27.6 | 8.6  |
| polyNIPAAm/LAM1     | -3.60                                 | 30.4              | 26.2 | 6.4  |

**Table SIII.** Low critical solution temperature (LCST), enthalpy of phase transition, and full width at half maximum (FWHM) determined from differential scanning calorimetry of polyNIPAAm hydrogel nanocomposites with incorporated Laponite and LAM nanoparticles.

| Sample          | LCST [°C] |      | $\Delta H_{VPT}$ [mJ/(g×K)] | FWHM [°C] |
|-----------------|-----------|------|-----------------------------|-----------|
|                 | onset     | peak |                             |           |
| polyNIPAAm/LAM1 | 33.1      | 35.5 | 624.3                       | 3.7       |
| polyNIPAAm/LAM2 | 33.1      | 36.0 | 857.0                       | 5.9       |
| polyNIPAAm/LAM3 | 33.2      | 37.4 | 825.3                       | 6.0       |
| polyNIPAAm/LAM4 | 32.9      | 35.5 | 694.3                       | 3.4       |
| polyNIPAAm/LAM5 | 33.4      | 35.5 | 899.6                       | 5.2       |

## Electronic Supplementary Information

O. Goncharuk, Yu. Samchenko, L. Kernosenko, et al. **Thermoresponsive hydrogels physically crosslinked with magnetically modified LAPONITE® nanoparticles.**

*Soft Matter* 2020; <https://doi.org/10.1039/D0SM00929F>

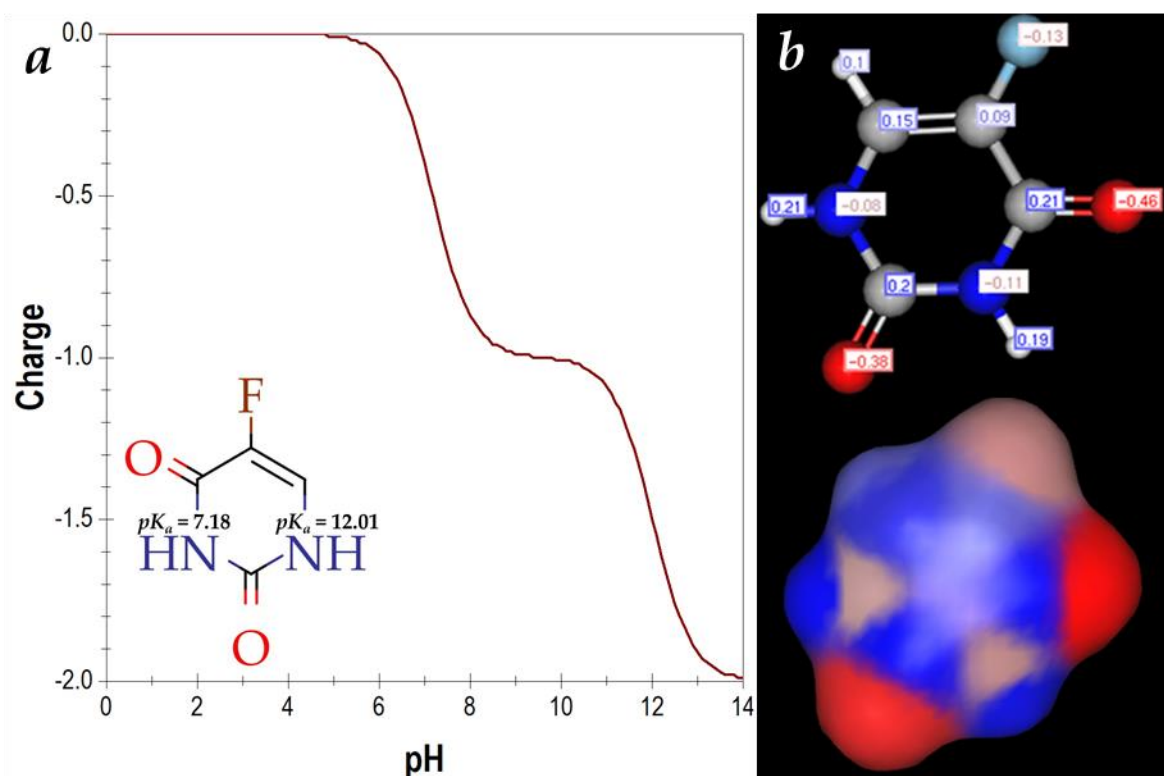

Fig. S2. Dependence of net charge of 5-fluorouracil on pH (a) and charge distribution in molecule at pH 5.7 (b). The insert is a chemical structure of 5-fluorouracil with two  $pK_a$  values.

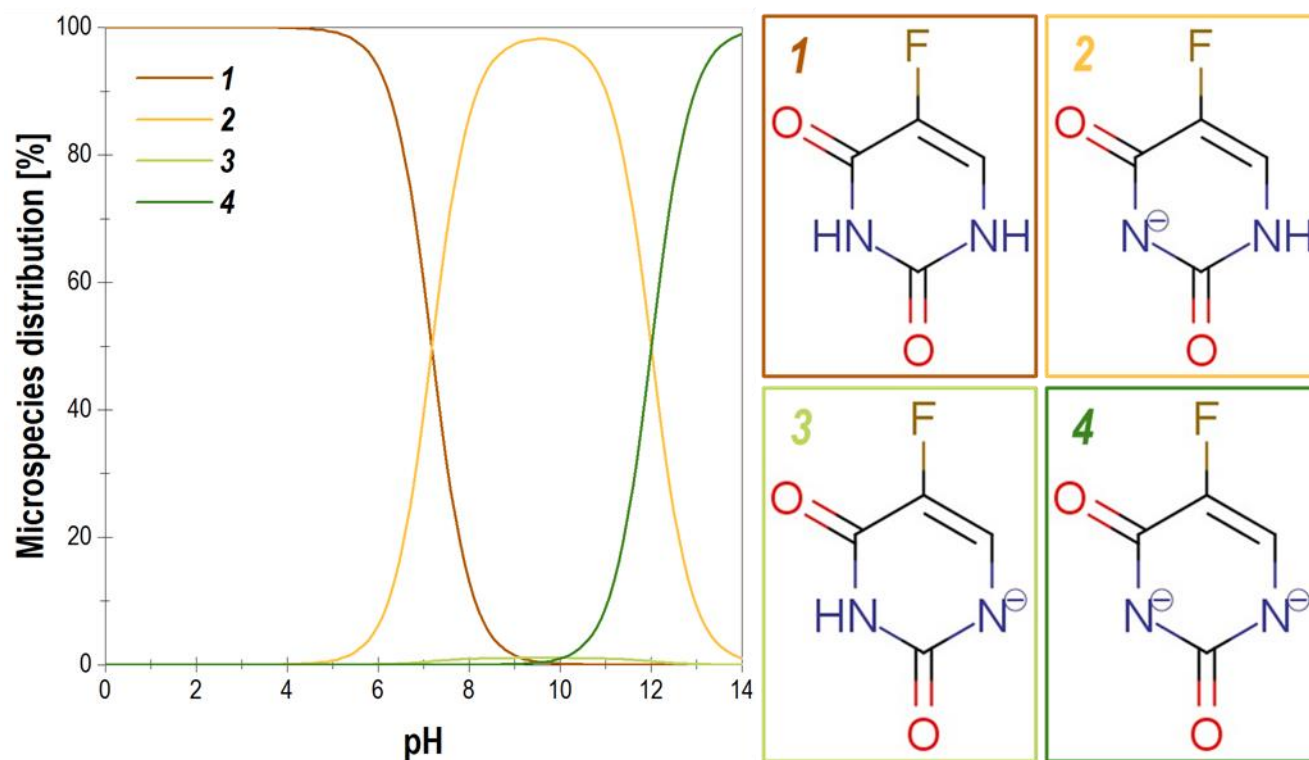

Fig. S3. Major microspecies distribution of 5-fluorouracil based on pH.

## Electronic Supplementary Information

O. Goncharuk, Yu. Samchenko, L. Kernosenko, et al. **Thermoresponsive hydrogels physically crosslinked with magnetically modified LAPONITE® nanoparticles.**

*Soft Matter* 2020; <https://doi.org/10.1039/D0SM00929F>

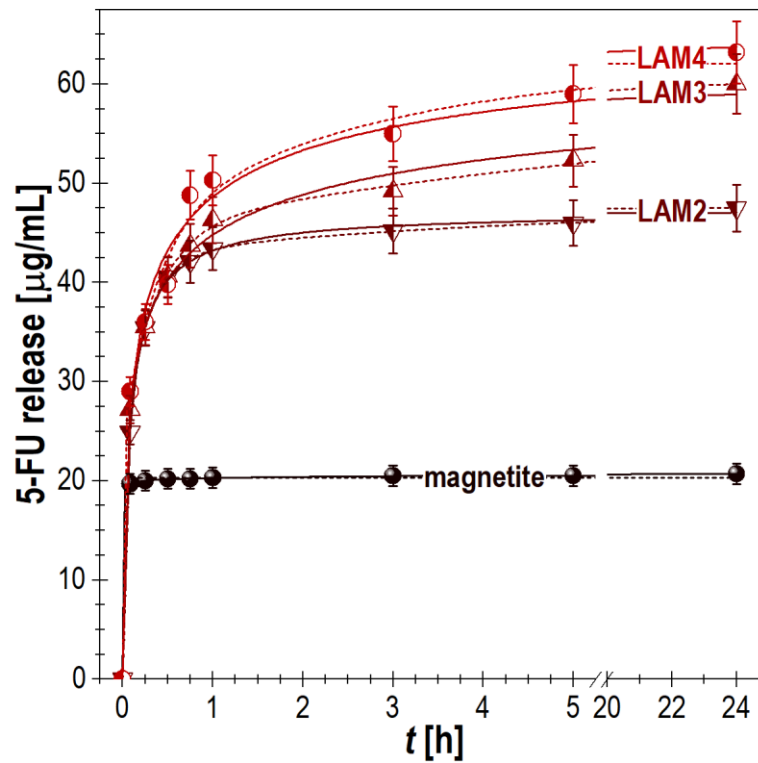

**Fig. S4.** Kinetics of 5-fluorouracil release (b) from magnetite (solid symbols) and LAM nanoparticles (half-filled symbols) with different magnetite-to-Laponite weight ratios: LAM2 (downward triangles), 1:1; LAM3, 1:2 (upward triangles); and LAM4 (circles), 1:4. The release kinetics was fitted to the power (solid lines, eq. 1) and to the exponential (dash line, eq. 2) equations.

Equations used for fitting the experimental data:

$$R = R_{max} \frac{t^n}{k^n + t^n} \quad (1)$$

$$R = R_{max} + R_1 e^{-t/k_1} + R_2 e^{-t/k_2} + R_3 e^{-t/k_3} \quad (2)$$

where  $R_{max}$  is the equilibrium amount of released drug;

$k, n, R_1, R_2, R_3, k_1, k_2,$  and  $k_3$  are the fitting parameters.
